# Supplementary material for: Imprinting alterations in sperm may not significantly influence ART outcomes and imprinting patterns in the cord blood of offspring
Source: PubMed Central journal article supplement (PMC5685618; doi:10.1371/journal.pone.0187869), 2017-11-14
Supplement: pone.0187869.s001.pdf [file pone.0187869.s001.pdf]

**S1 Table Methylation levels for imprinted genes in sperm from fertile controls.**

| ID   | KCNQ1OT1 |   |   |   |   |   |         | SNRPN |   |   |   |   | H19     |     |    |     |     |         |
|------|----------|---|---|---|---|---|---------|-------|---|---|---|---|---------|-----|----|-----|-----|---------|
|      | 1        | 2 | 3 | 4 | 5 | 6 | average | 1     | 2 | 3 | 4 | 5 | average | 1   | 2  | 3   | 4   | average |
| sc1  | 0        | 0 | 0 | 0 | 0 | 0 | 0.00    | 3     | 3 | 3 | 2 | 2 | 2.60    | 100 | 80 | 100 | 100 | 95.00   |
| sc2  | 0        | 3 | 0 | 2 | 0 | 0 | 0.83    | 2     | 0 | 0 | 0 | 0 | 0.40    | 93  | 67 | 96  | 97  | 88.25   |
| sc3  | 0        | 0 | 0 | 3 | 0 | 0 | 0.50    | 3     | 3 | 2 | 2 | 3 | 2.60    | 98  | 70 | 97  | 100 | 91.25   |
| sc4  | 0        | 4 | 3 | 3 | 3 | 0 | 2.17    | 3     | 0 | 0 | 0 | 0 | 0.60    | 100 | 67 | 97  | 97  | 90.25   |
| sc5  | 0        | 3 | 0 | 0 | 0 | 0 | 0.50    | 3     | 3 | 2 | 3 | 0 | 2.20    | 100 | 74 | 100 | 95  | 92.25   |
| sc6  | 0        | 3 | 3 | 4 | 0 | 0 | 1.67    | 2     | 0 | 0 | 0 | 0 | 0.40    | 100 | 88 | 97  | 95  | 95.00   |
| sc7  | 4        | 6 | 4 | 3 | 3 | 4 | 4.00    | 4     | 2 | 2 | 2 | 2 | 2.40    | 100 | 71 | 100 | 100 | 92.75   |
| sc8  | 0        | 4 | 3 | 3 | 0 | 0 | 1.67    | 3     | 2 | 2 | 2 | 2 | 2.20    | 100 | 77 | 98  | 96  | 92.75   |
| sc9  | 0        | 0 | 0 | 0 | 0 | 0 | 0.00    | 4     | 5 | 5 | 4 | 4 | 4.40    | 100 | 74 | 100 | 100 | 93.50   |
| sc10 | 0        | 0 | 0 | 0 | 0 | 0 | 0.00    | 2     | 2 | 2 | 1 | 2 | 1.80    | 100 | 81 | 97  | 98  | 94.00   |
| sc11 | 0        | 0 | 0 | 0 | 0 | 0 | 0.00    | 2     | 2 | 2 | 1 | 0 | 1.40    | 93  | 74 | 100 | 100 | 91.75   |
| sc12 | 1        | 0 | 2 | 0 | 2 | 0 | 0.83    | 3     | 3 | 3 | 2 | 3 | 2.80    | 100 | 74 | 96  | 98  | 92.00   |
| sc13 | 0        | 0 | 0 | 0 | 0 | 0 | 0.00    | 1     | 0 | 0 | 0 | 0 | 0.20    | 98  | 88 | 100 | 100 | 96.50   |
| sc14 | 0        | 0 | 1 | 2 | 0 | 0 | 0.50    | 2     | 1 | 2 | 2 | 2 | 1.80    | 100 | 83 | 97  | 97  | 94.25   |
| sc15 | 0        | 0 | 0 | 0 | 0 | 0 | 0.00    | 2     | 2 | 2 | 0 | 2 | 1.60    | 94  | 88 | 100 | 100 | 95.50   |
| sc16 | 1        | 0 | 0 | 0 | 0 | 0 | 0.17    | 2     | 2 | 2 | 1 | 2 | 1.80    | 96  | 73 | 98  | 95  | 90.50   |
| sc17 | 2        | 0 | 0 | 0 | 3 | 0 | 0.83    | 2     | 2 | 1 | 2 | 2 | 1.80    | 97  | 84 | 98  | 97  | 94.00   |
| sc18 | 0        | 0 | 0 | 0 | 0 | 0 | 0.00    | 1     | 0 | 0 | 0 | 0 | 0.20    | 94  | 88 | 100 | 98  | 95.00   |
| sc19 | 0        | 0 | 0 | 2 | 0 | 0 | 0.33    | 2     | 2 | 2 | 2 | 2 | 2.00    | 100 | 71 | 96  | 97  | 91.00   |
| sc20 | 0        | 0 | 0 | 0 | 0 | 0 | 0.00    | 2     | 0 | 0 | 0 | 0 | 0.40    | 99  | 70 | 98  | 99  | 91.50   |
| sc21 | 0        | 0 | 0 | 0 | 0 | 0 | 0.00    | 0     | 0 | 0 | 0 | 0 | 0.00    | 97  | 81 | 99  | 98  | 93.75   |
| sc22 | 2        | 0 | 2 | 0 | 0 | 0 | 0.67    | 2     | 1 | 2 | 2 | 2 | 1.80    | 100 | 65 | 96  | 97  | 89.50   |

|      |   |   |   |   |   |   |      |   |   |   |   |   |      |     |    |     |     |       |
|------|---|---|---|---|---|---|------|---|---|---|---|---|------|-----|----|-----|-----|-------|
| sc23 | 2 | 0 | 0 | 2 | 0 | 0 | 0.67 | 0 | 0 | 0 | 0 | 0 | 0.00 | 97  | 81 | 98  | 98  | 93.50 |
| sc24 | 0 | 0 | 0 | 0 | 0 | 0 | 0.00 | 2 | 1 | 1 | 1 | 2 | 1.40 | 100 | 74 | 98  | 98  | 92.50 |
| sc25 | 2 | 0 | 0 | 0 | 2 | 0 | 0.67 | 2 | 2 | 2 | 2 | 2 | 2.00 | 100 | 81 | 98  | 98  | 94.25 |
| sc26 | 0 | 0 | 0 | 0 | 0 | 0 | 0.00 | 2 | 3 | 2 | 0 | 2 | 1.80 | 93  | 86 | 100 | 100 | 94.75 |
| sc27 | 0 | 2 | 0 | 0 | 2 | 0 | 0.67 | 4 | 3 | 3 | 3 | 3 | 3.20 | 99  | 78 | 97  | 97  | 92.75 |
| sc28 | 0 | 0 | 0 | 0 | 0 | 0 | 0.00 | 1 | 0 | 0 | 0 | 0 | 0.20 | 100 | 69 | 97  | 97  | 90.75 |
| sc29 | 2 | 2 | 0 | 2 | 0 | 2 | 1.33 | 3 | 0 | 4 | 0 | 0 | 1.40 | 99  | 87 | 96  | 97  | 94.75 |
| sc30 | 0 | 0 | 0 | 0 | 5 | 0 | 0.83 | 1 | 1 | 1 | 0 | 0 | 0.60 | 98  | 95 | 100 | 100 | 98.25 |
| sc31 | 0 | 0 | 0 | 0 | 0 | 0 | 0.00 | 6 | 5 | 5 | 5 | 8 | 5.80 | 100 | 83 | 97  | 99  | 94.25 |

---
